# Supplementary material
Source: PubMed Central journal article supplement (PMC4337945)
Supplement: NIHMS664468-supplement-Suppl_.pdf [file NIHMS664468-supplement-Suppl_.pdf]

**Contents of Supporting Information:**

Experimental Section

**Cellular Toxicity Assay**..... 2

Supplementary Figures

**Supplementary Figure 1** ..... 3  
**Supplementary Figure 2** ..... 4  
**Supplementary Figure 3** ..... 5  
**Supplementary Figure 4** ..... 6  
**Supplementary Figure 5** ..... 7  
**Supplementary Figure 6** ..... 8

Supplementary Tables

**Supplementary Table 1**..... 9

## **Experimental Section**

### **Cellular Toxicity Assay**

Peripheral blood mononuclear cells (PBMCs) (Sanguine Biosciences) were plated in a dark 96-well plate at  $2.5-5 \times 10^5$  cells per well in RPMI medium (Cellgro) supplemented with 2X penicillin/streptomycin and 10% fetal bovine serum. N-[1-(2,3-Dioleoyloxy)propyl]-N,N,N-trimethylammonium methyl-sulfate (DOTAP) (Roche Applied Science) was used as a liposomal transfection agent. Formulation was carried out by mixing siRNAs and DOTAP at a working concentration of 10  $\mu\text{g}$  DOTAP/ $\mu\text{g}$  of RNA, and incubated at room temperature for 15-40 minutes. Cultured PBMCs were treated with the formulated siRNAs and incubated for 16 - 20 h at 37 °C. Cellular toxicity was quantified in triplicate by using CellTox™ Green Cytotoxicity Assay kit.

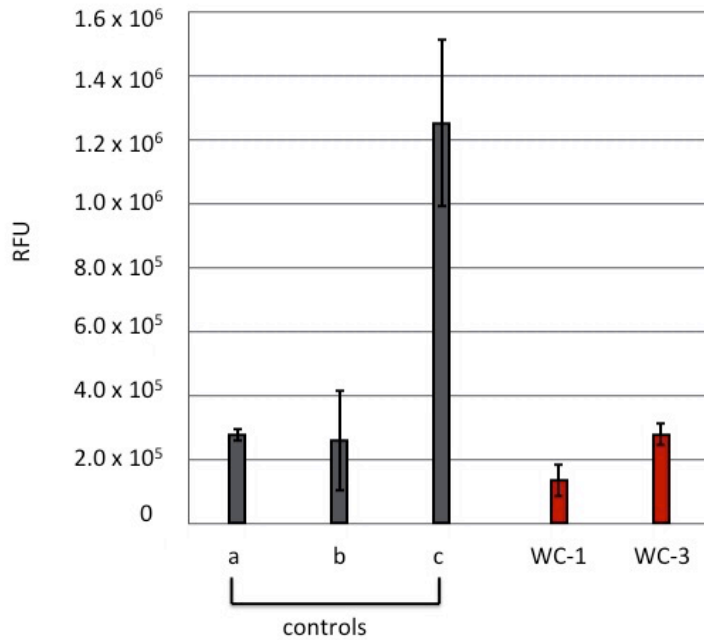

**Supplementary Figure 1:** Cytotoxic activity of the Watson-Crick (WC) face localized modification at guide positions 1 and 3. Modified PIK3CB siRNA (125nM) was transfected into human PBMCs. Controls: (a) cells only; (b) cells transfected with native siRNA; (c) lysed cells; Red bars: WC face localized modifications at guide positions 1 and 3. The CellTox™ Green Cytotoxicity Assay utilizes a dye that binds DNA from dead cells, resulting to an increase in fluorescence signal that is proportional to cytotoxicity. Viable cells show no substantial increases in fluorescence.

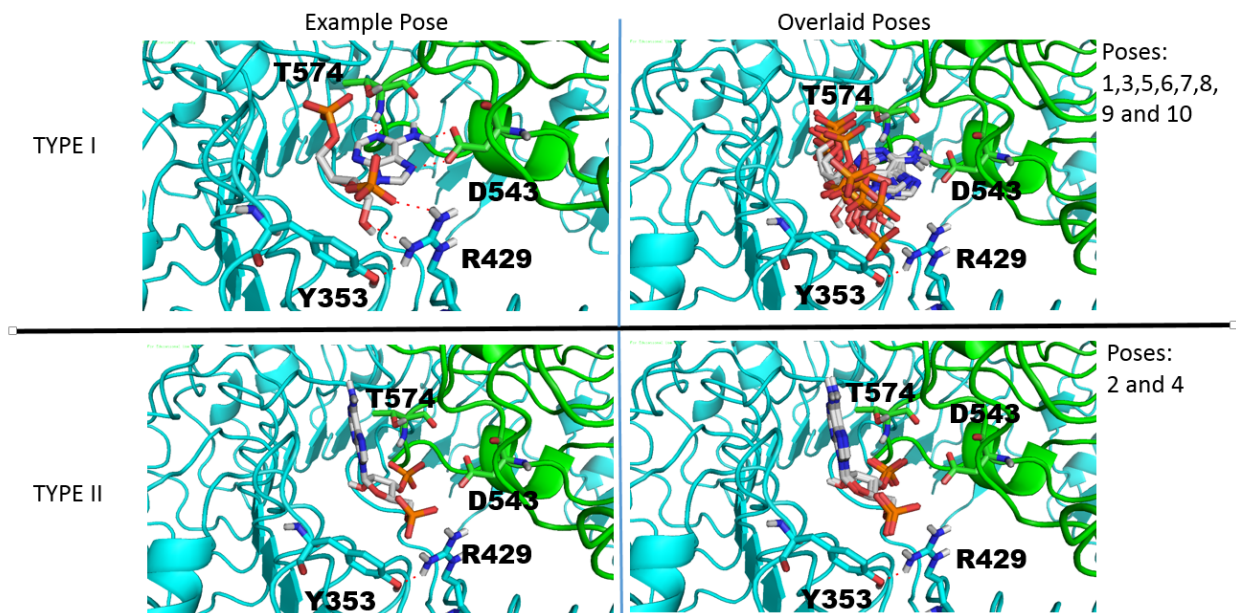

**Supplementary Figure 2:** The top 10 poses for adenosine-3',5'-bisphosphate bound into the CL097 receptor of TLR8. Example poses are shown to clarify nucleobase positioning which categorizes the nucleotides in a pose type.

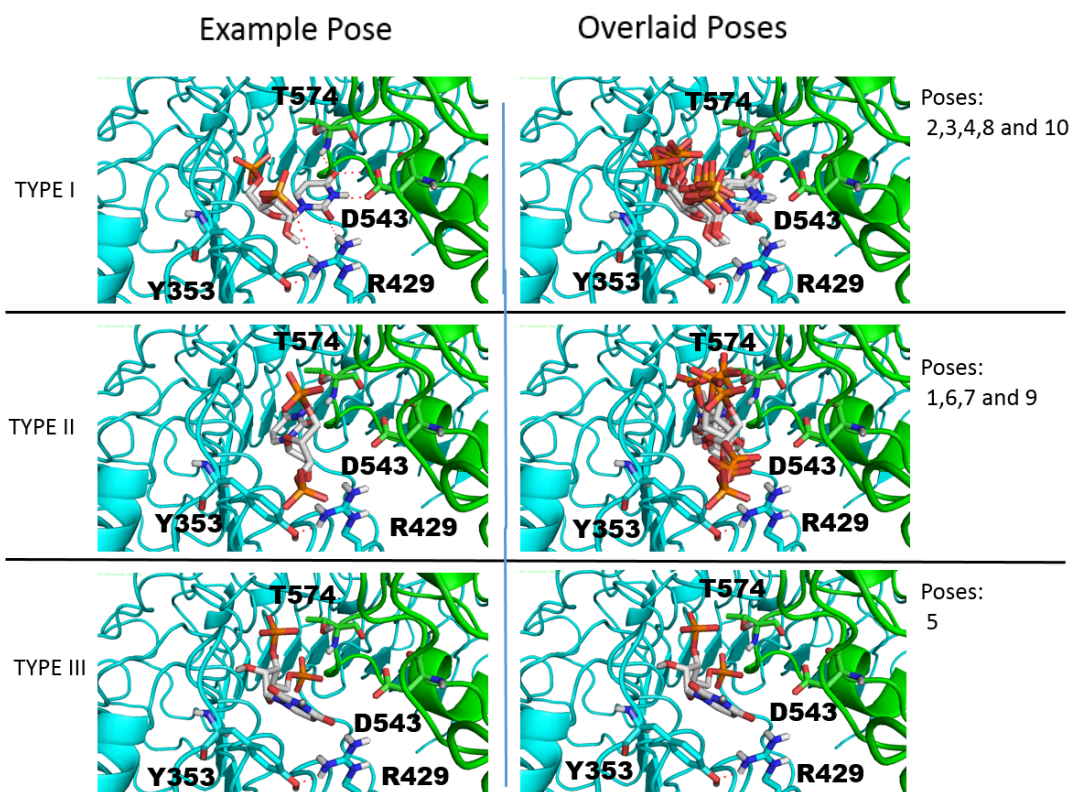

**Supplementary Figure 3:** The top 10 poses for uridine-3',5'-bisphosphate bound into the CL097 receptor of TLR8. Example poses are shown to clarify nucleobase positioning which categorizes the nucleotides in a pose type.

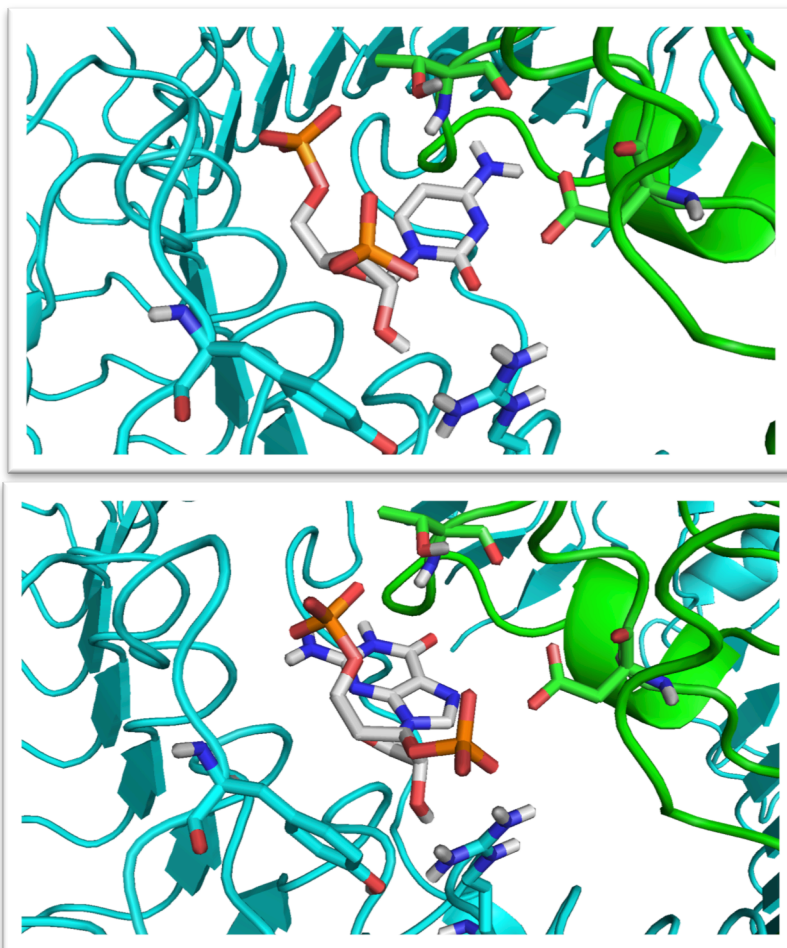

**Supplementary Figure 4:** Best poses for cytidine 3', 5' bisphosphate (top) and guanosine 3', 5'-bisphosphate (bottom) which adhere to constraints placed on them during molecular docking. Neither pose was exhibited at high frequency. C pose Chemgauss4 score: -2.250368; G pose Chemgauss4 score: -1.169547.

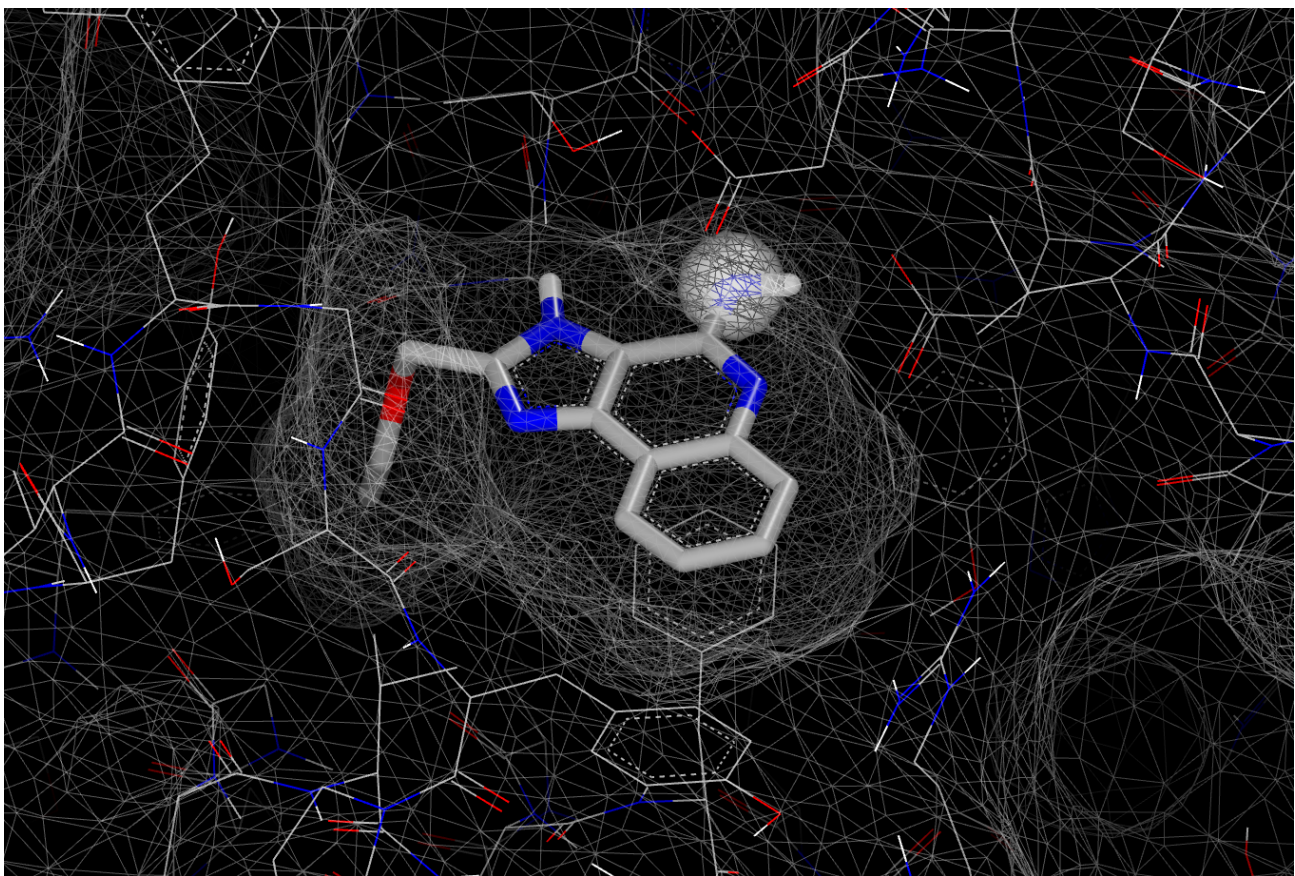

**Supplementary Figure 5:** Constraint for the docking experiment with adenosine 3', 5'-bisphosphate and CL097 binding site in TLR8. The exocyclic amine was constrained due to its important interaction with D543 in the complex with CL097.

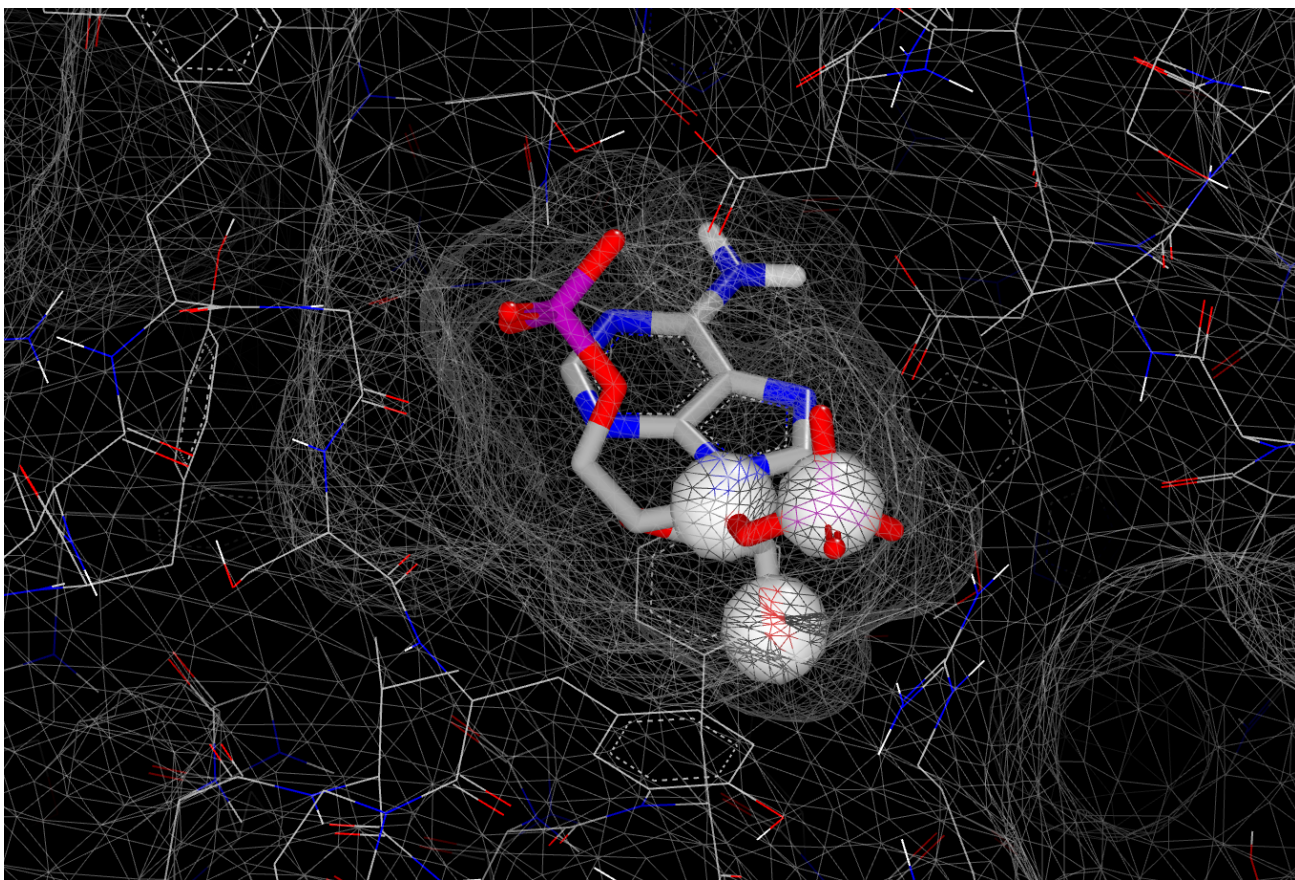

**Supplementary Figure 6:** Constraints for the docking experiments with U, C and G bisphosphates into TLR8. Constraints were placed on the best pose of adenosine 3', 5'-bisphosphate at the phosphorus atom of the 3' phosphate, the C3' carbon and C2' hydroxyl oxygen.



| A : Type I |                  | A: Type II |                  |             |                  |
|------------|------------------|------------|------------------|-------------|------------------|
| Pose #     | Chemgauss4 Score | Pose #     | Chemgauss4 Score |             |                  |
| 1          | -7.378654        | 2          | -7.065829        |             |                  |
| 3          | -6.798604        | 4          | -6.791432        |             |                  |
| 5          | -6.721918        |            |                  |             |                  |
| 6          | -6.629409        |            |                  |             |                  |
| 7          | -6.629411        |            |                  |             |                  |
| 8          | -6.607040        |            |                  |             |                  |
| 9          | -6.575839        |            |                  |             |                  |
| 10         | -6.574039        |            |                  |             |                  |
| U: Type I  |                  | U: Type II |                  | U: Type III |                  |
| Pose #     | Chemgauss4 Score | Pose #     | Chemgauss4 Score | Pose #      | Chemgauss4 Score |
| 3          | -5.76245         | 1          | -6.37066         | 2           | -5.881           |
| 4          | -5.74689         | 6          | -5.58019         |             |                  |
| 5          | -5.69126         | 7          | -5.52172         |             |                  |
| 8          | -5.45346         | 9          | -5.09956         |             |                  |
| 10         | -4.96019         |            |                  |             |                  |
| CL097      | -8.827235        |            |                  |             |                  |

**Supplementary Table 1:** Table of pose types, poses and the Chemgauss4 scores pertaining to them. The Chemgauss4 score for the CL097 pose from molecular docking which overlays the crystal structure is also reported.
